# Supplementary material
Source: PubMed Central journal article supplement (PMC548813)
Supplement: plntcell_tpc.104.027797_1.pdf [file plntcell_tpc.104.027797_1.pdf]

Supplemental Table S1  
Sequences homologous to *rMx* and *Mx* in the maize GSS database

| Sequence analysis of GenBank GSS database               |          |                                              |                       |          |                 |                                     |                                    |                     |
|---------------------------------------------------------|----------|----------------------------------------------|-----------------------|----------|-----------------|-------------------------------------|------------------------------------|---------------------|
| ID                                                      | 5' TSD   | 5' TIR                                       | 3' TIR                | 3' TSD   | Sequence length | % identity to <i>rMx</i> 180-bp end | % identity to <i>Mx</i> 180-bp end | No. CCCGAA + TTCGGG |
| <b>1a. Sequences adjacent to <i>rMx</i>-like 5' TIR</b> |          |                                              |                       |          |                 |                                     |                                    |                     |
| <i>rMx</i>                                              | GTGGAGGA | <u>TAG</u> CACTGGGCAT                        |                       |          | 180             | 100                                 | 76                                 | 4 + 1               |
| BZ368767                                                | gtaagagt | <u>TAG</u> CACTGGGCAT                        |                       |          | 100             | 91                                  | 72                                 |                     |
| BZ982159                                                | tgtgtagc | <u>TAG</u> CACTGGGCAT                        |                       |          | 175             | 82                                  | 69                                 | 2 + 0               |
| CG888784                                                | ggtgacgg | <u>TAG</u> CACTGAGCAT                        |                       |          | 171             | 82                                  | 66                                 | 3 + 0               |
| CG088731                                                | cctccagg | <u>TAG</u> CACTGGGCAT                        |                       |          | 180             | 80                                  | 65                                 | 3 + 1               |
| CC356586                                                | ggcgcgaa | <u>TAG</u> CACTGGGCAT                        |                       |          | 180             | 75                                  | 67                                 | 6 + 0               |
| CC369107                                                | ggtggcag | <u>TAG</u> CACTAGGCAT                        |                       |          | 180             | 73                                  | 53                                 | 1 + 0               |
| <b>1b. Sequences adjacent to <i>rMx</i>-like 3' TIR</b> |          |                                              |                       |          |                 |                                     |                                    |                     |
| <i>rMx</i>                                              |          |                                              | <u>ATG</u> CCCAGTCCTA | GTGGAGGA | 180             | 100                                 | 74                                 | 7 + 3               |
| BZ672184                                                |          | same sequence                                | <u>ATG</u> CCCAGTCCTA | gtaaagac | 144             |                                     |                                    |                     |
| CG058007                                                |          |                                              | <u>ATG</u> CCCAGTCCTA | gtaaagac | 111             |                                     |                                    |                     |
| CG110562                                                |          |                                              | <u>ATG</u> CCCAGTCCTA | gtaaagac | 180             | 96                                  | 72                                 | 5 + 2               |
| CG064758                                                |          | pairs with BZ368767?<br>they do not overlap. | <u>ATG</u> CCCAGTCCTA | gtaagagt | 180             | 96                                  | 72                                 | 4 + 3               |
| CG149316                                                |          |                                              | <u>ATG</u> CCCAGTCCTA | ctcacaac | 180             | 81                                  | 57                                 | 2 + 3               |
|                                                         |          |                                              |                       |          |                 |                                     |                                    |                     |
|                                                         |          |                                              |                       |          |                 |                                     |                                    |                     |
|                                                         |          |                                              |                       |          |                 |                                     |                                    |                     |

Bold: invariant TIR nucleotides characteristic of either *Mx* or *rMx* type elements  
Underline: nucleotides different from consensus TIR

Supplemental Table S1  
Sequences homologous to *rMx* and *Mx* in the maize GSS database

| ID                                                      | 5' TSD   | 5' TIR                                   | 3' TIR                    | 3' TSD          | Sequence length | % identity to <i>rMx</i> 180-bp end | % identity to <i>Mx</i> 180-bp end | No. CCCGAA + TTCGGG |
|---------------------------------------------------------|----------|------------------------------------------|---------------------------|-----------------|-----------------|-------------------------------------|------------------------------------|---------------------|
| <b>2a. Sequences adjacent to <i>Mx</i> -like 5' TIR</b> |          |                                          |                           |                 |                 |                                     |                                    |                     |
| <i>Mx</i>                                               | cactacac | <b>TCACAGTGGGCAT</b>                     |                           |                 | 180             | 72                                  | 100                                | 6 + 1               |
| ZMMBMa0346A06                                           | gatgagat | <b>TCACAGTGGGCAT</b>                     |                           |                 | 180             | 71                                  | 99                                 | 6 + 1               |
| ZMMBTa466O06                                            | gatgagat | <b>ACACAGTGGGCAT</b>                     | same sequence; A is error |                 |                 |                                     |                                    |                     |
| ZMMBMa0397E15                                           | acttgaag | <b>TCACAGTGGGCAT</b>                     | same sequence             |                 | 178             | 71                                  | 95                                 | 5 + 1               |
| ZMMBPa0063H11                                           | acttgaag | <b>TCACAGTGGGCAT</b>                     |                           |                 |                 |                                     |                                    |                     |
| ZMMBTa0640E17                                           | ctagcgag | <b>TCACACCGGGCAT</b>                     |                           |                 | 180             | 69                                  | 92                                 | 5 + 1               |
| ZMMBTa403G10                                            | ccaccaat | <b>TCACACTGGGCAT</b>                     | same TSD as ZMMBTa0786H18 |                 | 180             | 63                                  | 82                                 | 3 + 1               |
| ZMMBTa0543N15                                           | ccaccaat | <b>TCACACTGGGCAT</b>                     | same sequence             |                 |                 |                                     |                                    |                     |
| <b>2b. Sequences adjacent to <i>Mx</i> -like 3' TIR</b> |          |                                          |                           |                 |                 |                                     |                                    |                     |
| <i>Mx</i>                                               |          |                                          | <b>ATGCCCAGCGTGA</b>      | cactacac        | 180             | 74                                  | 100                                | 7 + 3               |
| ZMMBTa066D13                                            |          | probable seq. Error<br>(end of sequence) | <b>ATGCCCAGCG_GA</b>      | end of sequence | 179             | 75                                  | 98                                 | 7 + 3               |
| ZMMBTa399I15                                            |          |                                          | <b>ATGCCCAGCGTGA</b>      | gtttgatc        | 180             | 74                                  | 97                                 | 6 + 4               |
| ZMMBTa376A09                                            |          | same sequence                            | <b>ATGCCCAGCGTGA</b>      | actaaagg        | 180             | 74                                  | 96                                 | 6 + 3               |
| ZMMBTa442N13                                            |          |                                          | <b>ATGCCCAGCGTGA</b>      | actaaagg        |                 |                                     |                                    |                     |
| ZMMBTa350F01                                            |          | same sequence                            | <b>ATGCCCAACGTGA</b>      | gggtatga        | 180             | 68                                  | 93                                 | 5 + 3               |
| ZMMBTa0764K21                                           |          |                                          | <b>ATGCCCAACGTGA</b>      | gggtatga        |                 |                                     |                                    |                     |
| ZMMBTa0685J03                                           |          |                                          | <b>ATGCCCAGAGTGA</b>      | gtgtatcc        | 180             | 69                                  | 93                                 | 4 + 1               |
| ZMMBTa0639F10                                           |          |                                          | <b>ATGCCCAGCGTGA</b>      | gtatacac        | 180             | 69                                  | 91                                 | 5 + 3               |
| ZMMBTa0786H18                                           |          | same TSD as ZMMBTa40                     | <b>ATGCCCAGCGTGA</b>      | ccaccaat        | 180             | 64                                  | 89                                 | 3 + 2               |
| ZMMBTa0599F07                                           |          | same sequence                            | <b>ATGCCCAGCGTGA</b>      | ccaccaat        |                 |                                     |                                    |                     |

Bold: invariant TIR nucleotides characteristic of either *Mx* or *rMx* type elements  
Underline: nucleotides different from consensus TIR
